# Supplementary material
Source: MDPI journal article supplement (https://www.mdpi.com/2073-4395/11/6/1170)
Supplement: s1 [file s1]

1 **Table S1** Site and agronomic management details

2

| Year | Sites | Nearest Town | Soil type     | Plot length (m) | Plot width (m) | Row spacing (cm) | Sowing depth (cm) | Latitude  | Longitude | Sowing Date | Harvest Date | Fungicide application |            |           |
|------|-------|--------------|---------------|-----------------|----------------|------------------|-------------------|-----------|-----------|-------------|--------------|-----------------------|------------|-----------|
|      |       |              |               |                 |                |                  |                   |           |           |             |              | 1                     | 2          | 3         |
| 2017 | 17_1  | Corrigin     | Loamy clay    | 10              | 1.52           | 25.4             | 1.5               | -32.35704 | 117.95961 | 28/04/2017  | 11/11/2017   | 11/08/2017            |            |           |
|      | 17_2  | Dandaragan   | Sand          | 10              | 1.52           | 25.4             | 1                 | -30.28782 | 115.53747 | 2/05/2017   | 10/11/2017   | 8/09/2017             |            |           |
|      | 17_3  | Greenough    | Clay          | 10              | 1.52           | 25.4             | 1                 | -28.81609 | 114.74334 | 1/05/2017   | 31/10/2017   | 16/08/2017            |            |           |
|      | 17_4  | Katanning    | Loamy clay    | 10              | 1.52           | 25.4             | 1.5               | -33.68495 | 117.52923 | 6/05/2017   | 17/11/2017   | 16/08/2017            |            |           |
|      | 17_5  | Kojonup      | Sandy loam    | 10              | 1.52           | 25.4             | 1.5               | -33.96794 | 117.1328  | 7/05/2017   | 18/11/2017   | 17/08/2017            |            |           |
|      | 17_6  | Williams     | Loam          | 10              | 1.52           | 25.4             | 1.5               | -33.07302 | 116.7821  | 4/05/2017   | 2/12/2017    | 11/08/2017            |            |           |
|      | 17_7  | York         | Sandy loam    | 10              | 1.52           | 25.4             | 1.5               | -31.90872 | 116.70548 | 30/05/2017  | 15/11/2017   | 4/09/2017             |            |           |
| 2018 | 18_1  | Bolgart      | Loamy gravel  | 10              | 1.52           | 25.4             | 1.5               | -31.18343 | 116.56762 | 11/05/2018  | 12/11/2018   | 31/08/2018            |            |           |
|      | 18_2  | Corrigin     | Sandy loam    | 10              | 1.52           | 25.4             | 1                 | -32.38377 | 117.9265  | 25/05/2018  | 3/12/2018    | 31/08/2018            |            |           |
|      | 18_3  | Cranbrook    | Sandy loam    | 12              | 1.52           | 25.4             | 1                 | -34.33918 | 117.56718 | 5/05/2018   | 28/11/2018   | 11/09/2018            |            |           |
|      | 18_4  | Cunderdin    | Sandy loam    | 12              | 1.52           | 25.4             | 1                 | -31.56406 | 117.26985 | 2/05/2018   | 8/11/2018    | 31/08/2018            |            |           |
|      | 18_5  | Dandaragan   | Sand          | 12              | 1.52           | 25.4             | 1                 | -30.13769 | 115.5219  | 26/04/2018  | 21/11/2018   | 7/08/2018             |            |           |
|      | 18_6  | Greenough    | Loam          | 12              | 1.52           | 25.4             | 1.5               | -28.97918 | 114.78736 | 24/04/2018  | 30/10/2018   | 8/08/2018             |            |           |
|      | 18_7  | Kojonup      | Gravelly loam | 12              | 1.52           | 25.4             | 1                 | -33.91303 | 116.96344 | 19/05/2018  | 8/12/2018    | 6/09/2018             |            |           |
|      | 18_8  | Mingenew     | Loam          | 12              | 1.52           | 25.4             | 1                 | -29.16243 | 115.5859  | 24/04/2018  | 1/11/2018    | 17/08/2018            |            |           |
|      | 18_9  | Wagin        | Loam          | 12              | 1.52           | 25.4             | 1                 | -33.27223 | 117.59235 | 27/04/2018  | 29/11/2018   | 24/08/2018            |            |           |
|      | 18_10 | Williams     | Sandy loam    | 12              | 1.52           | 25.4             | 1                 | -32.99047 | 116.8988  | 26/04/2018  | 7/12/2018    | 7/08/2018             |            |           |
| 2019 | 19_1  | Bolgart      | Loam          | 10              | 1.52           | 25.4             | 1                 | -31.17879 | 116.54111 | 30/04/2019  | 6/11/2019    | 2/09/2019             | 9/09/2019  |           |
|      | 19_2  | Dandaragan   | Loam          | 12              | 1.52           | 25.4             | 1                 | -30.65821 | 115.72298 | 23/04/2019  | 7/11/2019    | 21/08/2019            |            |           |
|      | 19_3  | Kojonup      | Sandy loam    | 10              | 1.52           | 25.4             | 1                 | -33.8902  | 116.97895 | 18/05/2019  | 27/11/2019   | 6/09/2019             |            |           |
|      | 19_4  | Mingenew     | Loam          | 10              | 1.52           | 25.4             | 1                 | -29.20254 | 115.3215  | 25/04/2019  | 1/11/2019    | 21/08/2019            | 27/08/2019 |           |
|      | 19_5  | Williams     | Loam          | 10              | 1.52           | 25.4             | 1                 | -32.98096 | 116.88902 | 13/05/2019  | 18/11/2019   | 21/08/2019            | 28/08/2019 | 6/09/2019 |
| 2020 | 20_1  | Kojonup      | Sandy loam    | 10              | 1.85           | 25.4             | 1                 | -33.7496  | 116.884   | 9-May-20    | 25/12/2020   | 12/08/2020            |            |           |
|      | 20_2  | Moonyanooka  | Sandy loam    | 12              | 1.85           | 25               | 1.5               | -28.7945  | 114.7674  | 18-May-20   | 12/11/2019   | 6/08/2020             |            |           |
|      | 20_3  | Toodyay      | Loam          | 10              | 1.85           | 25.4             | 1                 | -31.47053 | 116.49358 | 18/04/2020  | 15/11/2020   | 31/07/2020            | 7/08/2020  |           |

3

4 **Table S2** Effect of fungicide application on Sclerotinia stem rot disease incidence (proportion of infected plants) and grain yield (t/ha) of ATR Bonito  
5 and Hyola 559T at 25 field sites across 4 years. Significance indicated by probability (P) values (*blank* not significant, \* <0.05, \*\* <0.01, \*\*\* <0.001).

| Site    | ATR Bonito                    |             |   |                         |             |   | Hyola 559TT                   |             |    |                         |             |   |
|---------|-------------------------------|-------------|---|-------------------------|-------------|---|-------------------------------|-------------|----|-------------------------|-------------|---|
|         | Disease Incidence ( $\pm$ se) |             |   | Yield (t/a) ( $\pm$ se) |             |   | Disease Incidence ( $\pm$ se) |             |    | Yield (t/a) ( $\pm$ se) |             |   |
|         | Untreated                     | Treated     | P | Untreated               | Treated     | P | Untreated                     | Treated     | P  | Untreated               | Treated     | P |
| 17_1    | 0.00 (0.00)                   | 0.00 (0.00) |   | 2.33 (0.09)             | 2.59 (0.14) |   | 0.00 (0.00)                   | 0.00 (0.00) |    | 2.87 (0.09)             | 2.69 (0.09) |   |
| 17_2    | 0.01 (0.01)                   | 0.00 (0.00) |   | 1.79 (0.11)             | 1.66 (0.16) |   | 0.02 (0.02)                   | 0.00 (0.00) |    | 1.90 (0.07)             | 1.94 (0.04) |   |
| 17_3    | 0.05 (0.02)                   | 0.02 (0.01) |   | 1.51 (0.03)             | 1.49 (0.13) |   | 0.07 (0.02)                   | 0.05 (0.03) |    | 1.91 (0.06)             | 2.03 (0.10) |   |
| 17_4    | 0.00 (0.00)                   | 0.00 (0.00) |   | 2.09 (0.06)             | 1.91 (0.29) |   | 0.00 (0.00)                   | 0.01 (0.01) |    | 2.29 (0.04)             | 2.50 (0.33) |   |
| 17_5    | 0.03 (0.02)                   | 0.05 (0.03) |   | 2.79 (0.08)             | 3.08 (0.19) |   | 0.01 (0.01)                   | 0.01 (0.01) |    | 3.16 (0.14)             | 3.22 (0.24) |   |
| 17_6    | 0.02 (0.01)                   | 0.03 (0.02) |   | 2.74 (0.09)             | 2.40 (0.25) |   | 0.01 (0.01)                   | 0.01 (0.01) |    | 2.34 (0.06)             | 2.33 (0.20) |   |
| 17_7    | 0.00 (0.00)                   | 0.00 (0.00) |   | 1.51 (0.13)             | 1.40 (0.07) |   | 0.00 (0.00)                   | 0.00 (0.00) |    | 1.61 (0.18)             | 1.73 (0.14) |   |
| 18_1    | 0.15 (0.02)                   | 0.05 (0.02) | * | 2.21 (0.08)             | 2.26 (0.01) |   | 0.17 (0.04)                   | 0.11 (0.05) |    | 2.40 (0.11)             | 2.63 (0.05) |   |
| 18_2    | 0.03 (0.01)                   | 0.02 (0.01) |   | 1.67 (0.14)             | 1.73 (0.04) |   | 0.03 (0.02)                   | 0.01 (0.01) |    | 1.65 (0.08)             | 1.89 (0.06) |   |
| 18_3    | 0.00 (0.00)                   | 0.00 (0.00) |   | 2.22 (0.04)             | 2.25 (0.15) |   | 0.04 (0.04)                   | 0.00 (0.00) |    | 2.36 (0.07)             | 2.62 (0.13) |   |
| 18_4    | 0.03 (0.01)                   | 0.05 (0.02) |   | 2.53 (0.12)             | 2.51 (0.17) |   | 0.04 (0.02)                   | 0.01 (0.01) |    | 2.68 (0.14)             | 2.86 (0.15) |   |
| 18_5    | 0.02 (0.01)                   | 0.00 (0.00) |   | 1.60 (0.04)             | 1.69 (0.08) |   | 0.05 (0.01)                   | 0.01 (0.01) |    | 2.16 (0.09)             | 2.38 (0.04) |   |
| 18_6    | not recorded                  |             |   | 1.01 (0.20)             | 1.03 (0.23) |   | not recorded                  |             |    | 1.85 (0.09)             | 1.88 (0.07) |   |
| 18_7    | 0.00 (0.00)                   | 0.00 (0.00) |   | 2.90 (0.05)             | 3.09 (0.09) |   | 0.03 (0.02)                   | 0.00 (0.00) |    | 3.16 (0.05)             | 3.44 (0.01) |   |
| 18_8    | 0.00 (0.00)                   | 0.00 (0.00) |   | 1.56 (0.13)             | 1.42 (0.04) |   | 0.00 (0.00)                   | 0.00 (0.00) |    | 1.80 (0.10)             | 1.83 (0.10) |   |
| 18_9    | 0.02 (0.01)                   | 0.01 (0.01) |   | 1.83 (0.07)             | 1.79 (0.01) |   | 0.01 (0.01)                   | 0.00 (0.00) |    | 2.09 (0.04)             | 2.09 (0.09) |   |
| 18_10   | 0.00 (0.00)                   | 0.00 (0.00) |   | 2.17 (0.13)             | 2.36 (0.20) |   | 0.00 (0.00)                   | 0.00 (0.00) |    | 2.56 (0.15)             | 2.62 (0.17) |   |
| 19_1    | 0.00 (0.00)                   | 0.00 (0.00) |   | 1.23 (0.09)             | 0.88 (0.19) |   | 0.00 (0.00)                   | 0.00 (0.00) |    | 0.87 (0.20)             | 1.10 (0.10) |   |
| 19_2    | 0.00 (0.00)                   | 0.00 (0.00) |   | 2.56 (0.09)             | 2.55 (0.12) |   | 0.00 (0.00)                   | 0.00 (0.00) |    | 2.76 (0.02)             | 2.88 (0.04) |   |
| 19_3    | 0.02 (0.01)                   | 0.02 (0.02) |   | 2.57 (0.08)             | 2.88 (0.05) |   | 0.07 (0.05)                   | 0.03 (0.02) |    | 2.99 (0.12)             | 3.14 (0.07) |   |
| 19_4    | 0.00 (0.00)                   | 0.00 (0.00) |   | 1.46 (0.05)             | 1.42 (0.08) |   | 0.00 (0.00)                   | 0.00 (0.00) |    | 1.66 (0.05)             | 1.58 (0.05) |   |
| 19_5    | 0.00 (0.00)                   | 0.00 (0.00) |   | 1.61 (0.16)             | 1.60 (0.16) |   | 0.00 (0.00)                   | 0.00 (0.00) |    | 2.14 (0.33)             | 1.96 (0.15) |   |
| 20_1    | 0.03 (0.02)                   | 0.07 (0.02) |   | 2.65 (0.15)             | 2.90 (0.06) |   | 0.13 (0.03)                   | 0.09 (0.01) |    | 2.65 (0.12)             | 2.86 (0.05) |   |
| 20_2    | 0.09 (0.04)                   | 0.11 (0.05) |   | 1.55 (0.12)             | 1.63 (0.06) |   | 0.07 (0.07)                   | 0.05 (0.03) |    | 1.90 (0.10)             | 1.83 (0.18) |   |
| 20_3    | 0.04 (0.01)                   | 0.04 (0.01) |   | 3.33 (0.05)             | 3.59 (0.21) |   | 0.05 (0.02)                   | 0.01 (0.01) |    | 3.66 (0.03)             | 3.56 (0.05) |   |
| Average | 0.02 (0.00)                   | 0.02 (0.00) |   | 2.06 (0.07)             | 2.09 (0.08) |   | 0.03 (0.01)                   | 0.02 (0.00) | ** | 2.30 (0.07)             | 2.39 (0.07) | * |

6 **Table S3** Effect of fungicide application on Sclerotinia stem rot disease incidence (proportion of infected plants) and grain yield (t/ha) of ATR Mako  
7 and InVigor T4510 at 18 field sites across 3 years. Significance indicated by probability (P) values (*blank* not significant, \* <0.01, \*\* <0.05, \*\*\* <0.001).

8

| Site    | ATR Mako                      |             |     |                         |             |   | InVigor T4510                 |             |     |                         |             |   |
|---------|-------------------------------|-------------|-----|-------------------------|-------------|---|-------------------------------|-------------|-----|-------------------------|-------------|---|
|         | Disease Incidence ( $\pm$ se) |             |     | Yield (t/a) ( $\pm$ se) |             |   | Disease Incidence ( $\pm$ se) |             |     | Yield (t/a) ( $\pm$ se) |             |   |
|         | Untreated                     | Treated     | P   | Untreated               | Treated     | P | Untreated                     | Treated     | P   | Untreated               | Treated     | P |
| 18_1    | 0.31 (0.03)                   | 0.15 (0.04) | *** | 2.00 (0.08)             | 2.21 (0.05) |   | 0.15 (0.05)                   | 0.05 (0.03) |     | 2.48 (0.11)             | 2.70 (0.04) |   |
| 18_2    | 0.05 (0.01)                   | 0.01 (0.01) |     | 1.59 (0.06)             | 1.70 (0.22) |   | 0.05 (0.01)                   | 0.01 (0.01) |     | 2.05 (0.10)             | 1.99 (0.09) |   |
| 18_3    | 0.03 (0.01)                   | 0.00 (0.00) |     | 2.31 (0.09)             | 2.40 (0.21) |   | 0.01 (0.01)                   | 0.00 (0.00) |     | 2.72 (0.14)             | 2.89 (0.13) |   |
| 18_4    | 0.11 (0.02)                   | 0.04 (0.01) |     | 2.38 (0.17)             | 2.40 (0.07) |   | 0.06 (0.02)                   | 0.06 (0.01) |     | 2.66 (0.16)             | 2.78 (0.12) |   |
| 18_5    | 0.03 (0.01)                   | 0.02 (0.00) |     | 1.39 (0.04)             | 1.60 (0.03) |   | 0.00 (0.00)                   | 0.01 (0.01) |     | 1.93 (0.06)             | 2.21 (0.05) |   |
| 18_6    | not recorded                  |             |     | 1.21 (0.20)             | 1.16 (0.18) |   | not recorded                  |             |     | 1.47 (0.14)             | 1.44 (0.36) |   |
| 18_7    | 0.01 (0.01)                   | 0.01 (0.01) |     | 2.88 (0.02)             | 2.93 (0.08) |   | 0.03 (0.01)                   | 0.00 (0.00) |     | 3.34 (0.04)             | 3.40 (0.05) |   |
| 18_8    | 0.04 (0.00)                   | 0.02 (0.01) |     | 1.34 (0.13)             | 1.47 (0.04) |   | 0.00 (0.00)                   | 0.02 (0.01) |     | 1.75 (0.05)             | 1.77 (0.11) |   |
| 18_9    | 0.03 (0.02)                   | 0.00 (0.00) |     | 1.96 (0.09)             | 1.94 (0.05) |   | 0.00 (0.00)                   | 0.00 (0.00) |     | 2.33 (0.08)             | 2.30 (0.07) |   |
| 18_10   | 0.00 (0.00)                   | 0.00 (0.00) |     | 2.10 (0.06)             | 2.16 (0.22) |   | 0.00 (0.00)                   | 0.00 (0.00) |     | 2.77 (0.14)             | 2.75 (0.24) |   |
| 19_1    | 0.00 (0.00)                   | 0.00 (0.00) |     | 0.87 (0.16)             | 0.79 (0.16) |   | 0.00 (0.00)                   | 0.00 (0.00) |     | 1.09 (0.16)             | 1.23 (0.11) |   |
| 19_2    | 0.00 (0.00)                   | 0.00 (0.00) |     | 2.44 (0.04)             | 2.23 (0.13) |   | 0.00 (0.00)                   | 0.00 (0.00) |     | 2.67 (0.18)             | 2.91 (0.08) |   |
| 19_3    | 0.05 (0.04)                   | 0.03 (0.02) |     | 2.62 (0.03)             | 2.66 (0.06) |   | 0.05 (0.02)                   | 0.03 (0.02) |     | 3.06 (0.05)             | 3.21 (0.05) |   |
| 19_4    | 0.00 (0.00)                   | 0.00 (0.00) |     | 1.38 (0.10)             | 1.42 (0.07) |   | 0.00 (0.00)                   | 0.00 (0.00) |     | 1.65 (0.09)             | 1.63 (0.06) |   |
| 19_5    | 0.00 (0.00)                   | 0.01 (0.01) |     | 1.56 (0.21)             | 1.51 (0.25) |   | 0.00 (0.00)                   | 0.00 (0.00) |     | 2.02 (0.27)             | 2.13 (0.24) |   |
| 20_1    | 0.15 (0.05)                   | 0.06 (0.01) |     | 2.24 (0.05)             | 2.69 (0.14) |   | 0.13 (0.04)                   | 0.02 (0.01) |     | 3.22 (0.05)             | 3.23 (0.04) |   |
| 20_2    | 0.14 (0.07)                   | 0.14 (0.04) |     | 1.53 (0.10)             | 1.40 (0.05) |   | 0.18 (0.04)                   | 0.05 (0.05) | *   | 1.96 (0.10)             | 1.95 (0.07) |   |
| 20_3    | 0.13 (0.04)                   | 0.05 (0.01) |     | 3.37 (0.06)             | 3.56 (0.16) |   | 0.09 (0.04)                   | 0.03 (0.01) | **  | 4.04 (0.22)             | 4.27 (0.10) |   |
| Average | 0.06 (0.01)                   | 0.03 (0.01) | **  | 1.96 (0.09)             | 2.02 (0.10) |   | 0.04 (0.01)                   | 0.02 (0.00) | *** | 2.40 (0.10)             | 2.49 (0.11) |   |

9

**Table S4.** Effect of fungicide application on Sclerotinia stem rot disease incidence (proportion of infected plants) and grain yield (t/ha) of canola varieties at 18 field sites across 3 years. Significance indicated by probability (P) values (*blank* not significant, \* <0.05, \*\* <0.01, \*\*\* <0.001).

| Variety         | Site           | Disease Incidence ( $\pm$ se) |                            |   | Yield (t/ha) ( $\pm$ se) |                            |   |
|-----------------|----------------|-------------------------------|----------------------------|---|--------------------------|----------------------------|---|
|                 |                | Untreated                     | Fungicide at 30% flowering | P | Untreated                | Fungicide at 30% flowering | P |
| DG 408RR        | 19_1           | 0.00 (0.00)                   | 0.00 (0.00)                |   | 1.28 (0.08)              | 1.22 (0.12)                |   |
|                 | 19_2           | 0.00 (0.00)                   | 0.00 (0.00)                |   | 3.00 (0.07)              | 3.25 (0.06)                |   |
|                 | 19_3           | 0.04 (0.02)                   | 0.05 (0.03)                |   | 3.33 (0.07)              | 3.92 (0.34)                |   |
|                 | 19_4           | 0.00 (0.00)                   | 0.00 (0.00)                |   | 1.77 (0.11)              | 1.67 (0.03)                |   |
|                 | 19_5           | 0.00 (0.00)                   | 0.00 (0.00)                |   | 2.59 (0.17)              | 2.53 (0.12)                |   |
|                 | 20_1           | 0.13 (0.03)                   | 0.03 (0.02)                | * | 2.95 (0.08)              | 2.88 (0.16)                |   |
|                 | 20_2           | 0.10 (0.01)                   | 0.07 (0.04)                |   | 2.29 (0.17)              | 2.26 (0.01)                |   |
|                 | 20_3           | 0.05 (0.01)                   | 0.03 (0.01)                |   | 4.27 (0.06)              | 4.30 (0.20)                |   |
|                 | <i>Average</i> | <i>0.04 (0.01)</i>            | <i>0.02 (0.01)</i>         | * | <i>2.69 (0.18)</i>       | <i>2.76 (0.21)</i>         |   |
| Pioneer 43Y23RR | 19_1           | 0.00 (0.00)                   | 0.00 (0.00)                |   | 1.33 (0.08)              | 1.34 (0.06)                |   |
|                 | 19_2           | 0.00 (0.00)                   | 0.00 (0.00)                |   | 3.09 (0.08)              | 2.74 (0.15)                |   |
|                 | 19_3           | 0.03 (0.03)                   | 0.03 (0.01)                |   | 3.79 (0.04)              | 3.33 (0.32)                |   |
|                 | 19_4           | 0.00 (0.00)                   | 0.00 (0.00)                |   | 1.67 (0.17)              | 1.89 (0.20)                |   |
|                 | 19_5           | 0.00 (0.00)                   | 0.00 (0.00)                |   | 2.58 (0.15)              | 2.74 (0.06)                |   |
|                 | 20_1           | 0.16 (0.05)                   | 0.07 (0.01)                |   | 2.76 (0.10)              | 3.14 (0.09)                |   |
|                 | 20_2           | 0.05 (0.03)                   | 0.12 (0.08)                |   | 2.22 (0.13)              | 2.42 (0.26)                |   |
|                 | 20_3           | 0.09 (0.02)                   | 0.02 (0.01)                |   | 3.73 (0.15)              | 3.78 (0.27)                |   |
|                 | <i>Average</i> | <i>0.04 (0.01)</i>            | <i>0.03 (0.01)</i>         |   | <i>2.65 (0.18)</i>       | <i>2.67 (0.16)</i>         |   |
| Pioneer 44Y27RR | 19_1           | 0.00 (0.00)                   | 0.00 (0.00)                |   | 1.34 (0.08)              | 1.21 (0.20)                |   |
|                 | 19_2           | 0.00 (0.00)                   | 0.00 (0.00)                |   | 2.95 (0.12)              | 2.91 (0.17)                |   |
|                 | 19_3           | 0.03 (0.02)                   | 0.03 (0.01)                |   | 3.61 (0.23)              | 3.26 (0.14)                |   |
|                 | 19_4           | 0.00 (0.00)                   | 0.00 (0.00)                |   | 1.75 (0.11)              | 1.84 (0.11)                |   |
|                 | 19_5           | 0.00 (0.00)                   | 0.00 (0.00)                |   | 2.58 (0.08)              | 2.43 (0.03)                |   |
|                 | 20_1           | 0.06 (0.03)                   | 0.07 (0.01)                |   | 2.95 (0.09)              | 2.92 (0.07)                |   |
|                 | 20_2           | 0.05 (0.01)                   | 0.00 (0.00)                |   | 2.20 (0.09)              | 2.42 (0.27)                |   |
|                 | 20_3           | 0.05 (0.01)                   | 0.03 (0.01)                |   | 4.12 (0.02)              | 4.08 (0.10)                |   |
|                 | <i>Average</i> | <i>0.03 (0.01)</i>            | <i>0.02 (0.01)</i>         |   | <i>2.69 (0.18)</i>       | <i>2.64 (0.08)</i>         |   |
| Hyola 350TT     | 19_1           | 0.00 (0.00)                   | 0.00 (0.00)                |   | 0.96 (0.11)              | 1.36 (0.02)                |   |
|                 | 19_2           | 0.00 (0.00)                   | 0.00 (0.00)                |   | 2.85 (0.02)              | 2.80 (0.17)                |   |
|                 | 19_3           | 0.06 (0.01)                   | 0.01 (0.01)                | * | 3.01 (0.11)              | 2.93 (0.06)                |   |
|                 | 19_4           | 0.00 (0.00)                   | 0.00 (0.00)                |   | 1.63 (0.08)              | 1.68 (0.01)                |   |
|                 | 19_5           | 0.00 (0.00)                   | 0.00 (0.00)                |   | 1.90 (0.21)              | 2.12 (0.11)                |   |
|                 | <i>Average</i> | <i>0.01 (0.01)</i>            | <i>0.00 (0.00)</i>         | * | <i>2.07 (0.21)</i>       | <i>2.18 (0.17)</i>         |   |
| Hyola 530XT     | 19_1           | 0.00 (0.00)                   | 0.00 (0.00)                |   | 1.06 (0.08)              | 1.21 (0.11)                |   |
|                 | 19_2           | 0.00 (0.00)                   | 0.00 (0.00)                |   | 2.60 (0.11)              | 2.90 (0.16)                |   |
|                 | 19_3           | 0.05 (0.02)                   | 0.03 (0.01)                |   | 2.73 (0.12)              | 3.11 (0.10)                |   |
|                 | 19_4           | 0.00 (0.00)                   | 0.00 (0.00)                |   | 1.65 (0.10)              | 1.52 (0.11)                |   |

| Variety        | Site           | Disease Incidence ( $\pm$ se) |                            |   | Yield (t/ha) ( $\pm$ se) |                            |   |
|----------------|----------------|-------------------------------|----------------------------|---|--------------------------|----------------------------|---|
|                |                | Untreated                     | Fungicide at 30% flowering |   | Untreated                | Fungicide at 30% flowering |   |
|                |                |                               |                            | P |                          |                            | P |
|                | 19_5           | 0.00 (0.00)                   | 0.00 (0.00)                |   | 2.10 (0.12)              | 1.93 (0.08)                |   |
|                | <i>Average</i> | 0.01 (0.01)                   | 0.00 (0.00)                |   | 2.03 (0.17)              | 2.14 (0.21)                |   |
| HyTTec Trophy  | 19_1           | 0.00 (0.00)                   | 0.00 (0.00)                |   | 0.99 (0.13)              | 1.28 (0.06)                |   |
|                | 19_2           | 0.00 (0.00)                   | 0.00 (0.00)                |   | 2.83 (0.06)              | 2.82 (0.16)                |   |
|                | 19_3           | 0.04 (0.01)                   | 0.05 (0.01)                |   | 3.33 (0.14)              | 3.40 (0.02)                |   |
|                | 19_4           | 0.00 (0.00)                   | 0.00 (0.00)                |   | 1.65 (0.08)              | 1.74 (0.08)                |   |
|                | 19_5           | 0.01 (0.01)                   | 0.00 (0.00)                |   | 2.39 (0.30)              | 2.13 (0.34)                |   |
|                | <i>Average</i> | 0.01 (0.00)                   | 0.01 (0.00)                |   | 2.24 (0.23)              | 2.28 (0.21)                |   |
|                |                |                               |                            |   |                          |                            |   |
| HyTTec Trident | 20_1           | 0.05 (0.03)                   | 0.06 (0.02)                |   | 3.28 (0.05)              | 3.26 (0.20)                |   |
|                | 20_2           | 0.05 (0.03)                   | 0.04 (0.01)                |   | 2.07 (0.05)              | 2.22 (0.07)                |   |
|                | 20_3           | 0.05 (0.01)                   | 0.03 (0.01)                |   | 3.46 (0.25)              | 3.69 (0.15)                |   |
|                | <i>Average</i> | 0.05 (0.01)                   | 0.04 (0.01)                |   | 2.94 (0.23)              | 3.06 (0.23)                |   |
| InVigor R4022P | 20_1           | 0.07 (0.02)                   | 0.05 (0.02)                |   | 2.62 (0.06)              | 2.82 (0.05)                |   |
|                | 20_2           | 0.12 (0.03)                   | 0.04 (0.01)                |   | 2.24 (0.09)              | 2.38 (0.13)                |   |
|                | 20_3           | 0.09 (0.02)                   | 0.03 (0.01)                |   | 4.06 (0.11)              | 4.13 (0.12)                |   |
|                | <i>Average</i> | 0.09 (0.01)                   | 0.04 (0.01)                | * | 2.97 (0.28)              | 3.11 (0.27)                |   |
| Xseed Raptor   | 20_1           | 0.10 (0.04)                   | 0.04 (0.03)                |   | 3.02 (0.11)              | 3.06 (0.11)                |   |
|                | 20_2           | 0.07 (0.01)                   | 0.06 (0.00)                |   | 2.04 (0.04)              | 2.05 (0.08)                |   |
|                | 20_3           | 0.08 (0.01)                   | 0.04 (0.00)                |   | 4.12 (0.13)              | 3.88 (0.25)                |   |
|                | <i>Average</i> | 0.08 (0.01)                   | 0.05 (0.01)                |   | 3.06 (0.31)              | 3.00 (0.28)                |   |

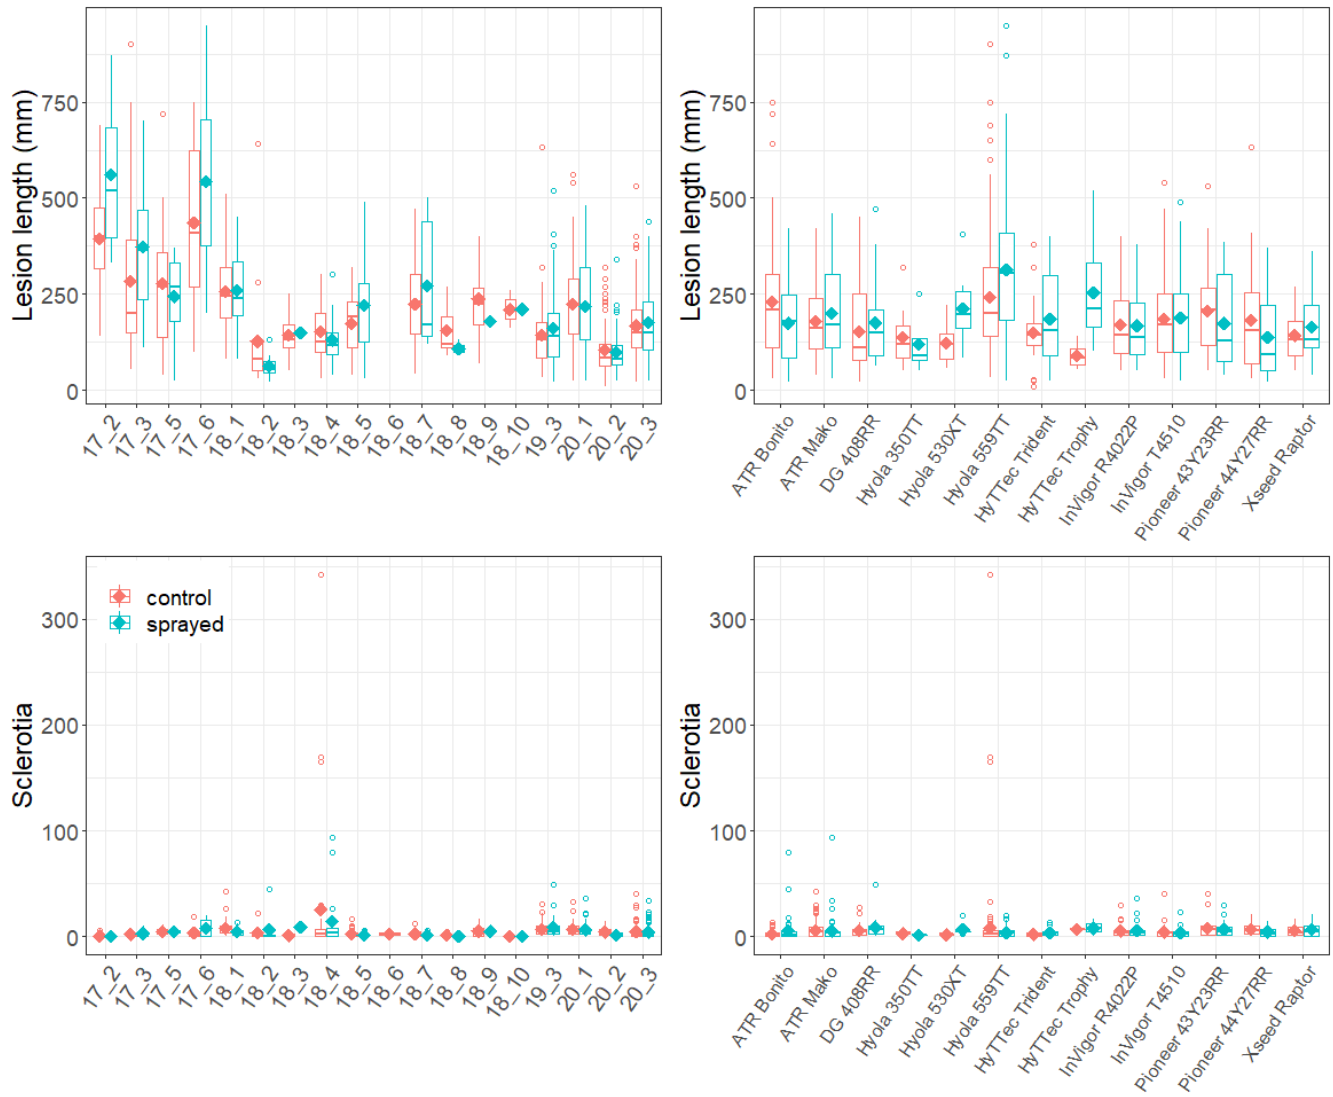

**Figure S1** Lesion length and number of sclerotia in Sclerotinia stem rot diseased stems averaged by trial site and Variety across four growing seasons (2017-2020).

18

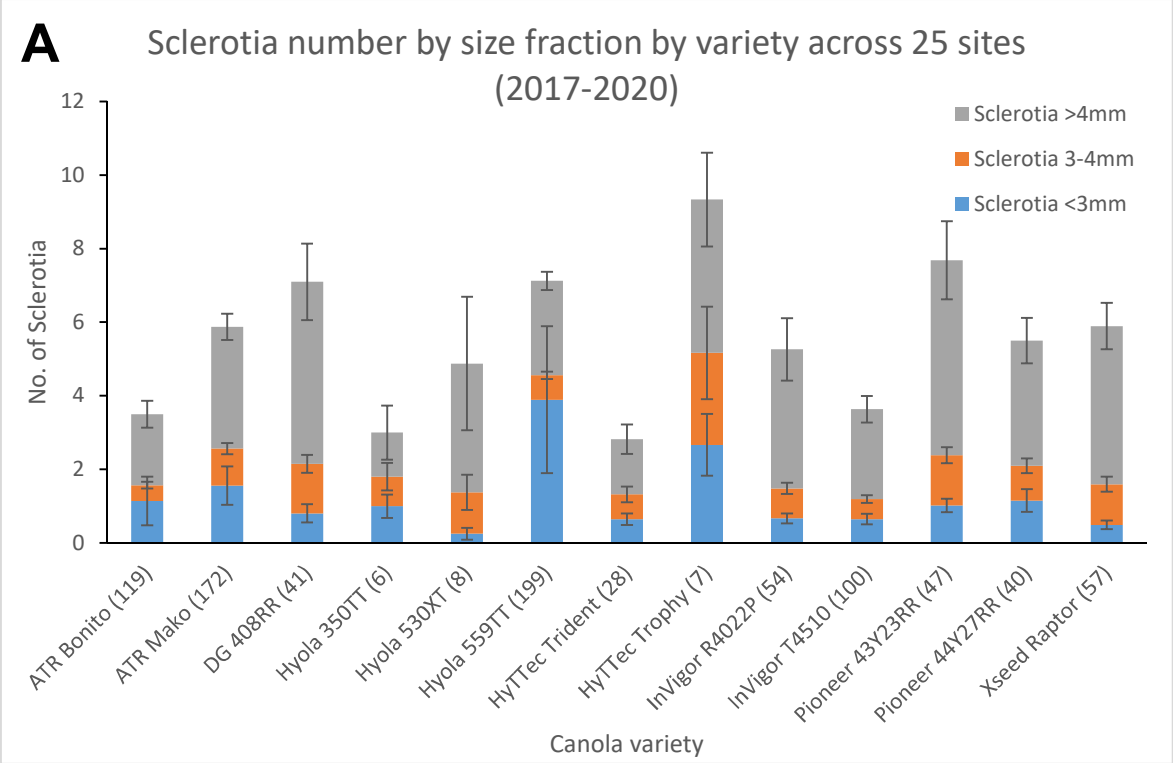

19

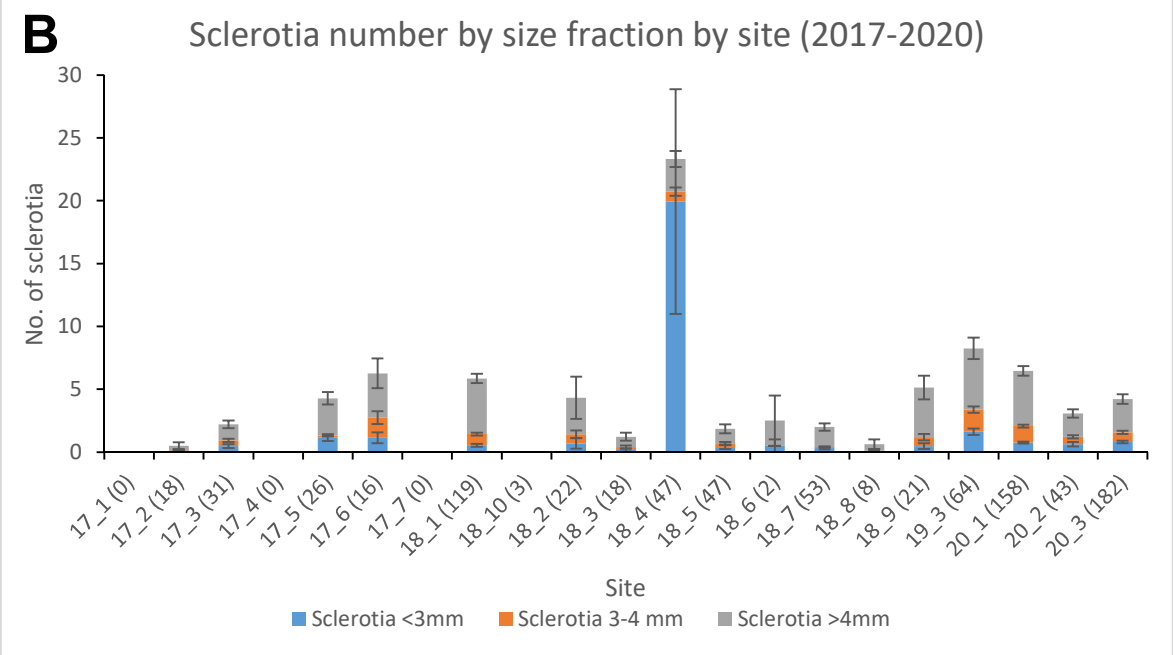

20

21

22

23

24

**Figure S2.** Number of sclerotia produced within a Sclerotinia stem rot diseased stem averaged by A) Variety and B) Site across four growing seasons (2017-2020), separated by size fractions of <3 mm, 3-4 mm and >4 mm. The number in brackets after the trial site name is the number of diseased stems included in the column mean.
